# Supplementary material for: Nano-assembly of bovine serum albumin driven by rare-earth-ion (Gd) biomineralization for highly efficient photodynamic therapy and tumor imaging
Source: Royal Society of Chemistry journal article supplement (doi:10.1039/c5tb01962a), 2015-12-18
Supplement: c5tb01962a1.pdf [file c5tb01962a1.pdf]

SUPPLEMENTARY INFORMATION

FOR

**Nano-assembly of Bovine Serum Albumin Driven by Rare-earth-ion (Gd) Biomineralization for Highly Efficient Photodynamic Therapy and Tumor Imaging**

Ya Wen,<sup>a</sup> Haiqing Dong,<sup>a</sup> \* Yan Li,<sup>a</sup> Aijun Shen,<sup>b</sup> Yongyong Li.<sup>a</sup> \*

<sup>a</sup> *Shanghai East Hospital, The Institute for Biomedical Engineering & Nano Science (iNANO), Tongji University School of Medicine, Shanghai 200092, P.R.China. E-mail: inano\_donghq@tongji.edu.cn (Dong H.); yongyong\_li@tongji.edu.cn (Li Y.).*

<sup>b</sup> *Department of Medical Imaging, Nantong Tumor Hospital, Nantong University, Nantong 226361, P.R.China. E-mail: sajdzyx@126.com (Shen A.).*

*\*Corresponding author: inano\_donghq@tongji.edu.cn (Dong H.); yongyong\_li@tongji.edu.cn (Li Y.).*

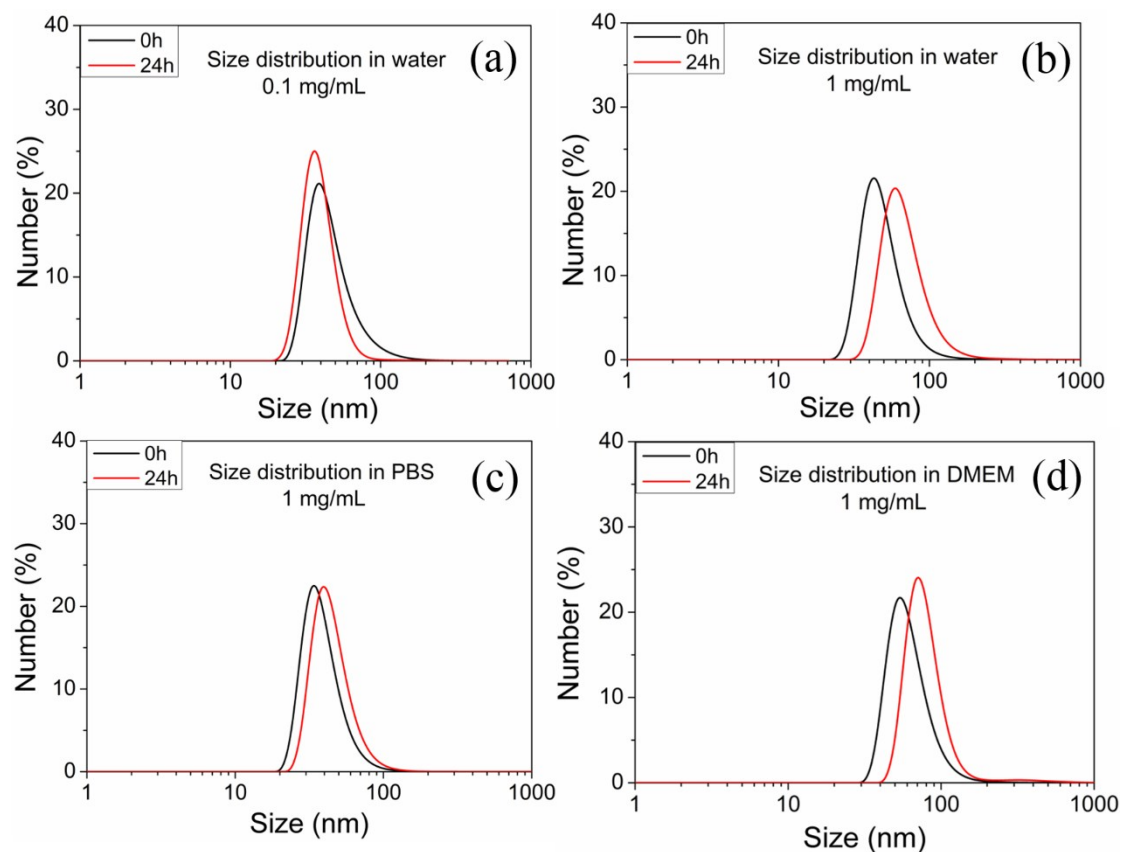

**Figure S1.** The size distribution of Gd@BSA-Ce6 nanoparticles before and after deposit for 24 h in water with different concentrations (a and b) and in PBS (c) and DMEM (d).

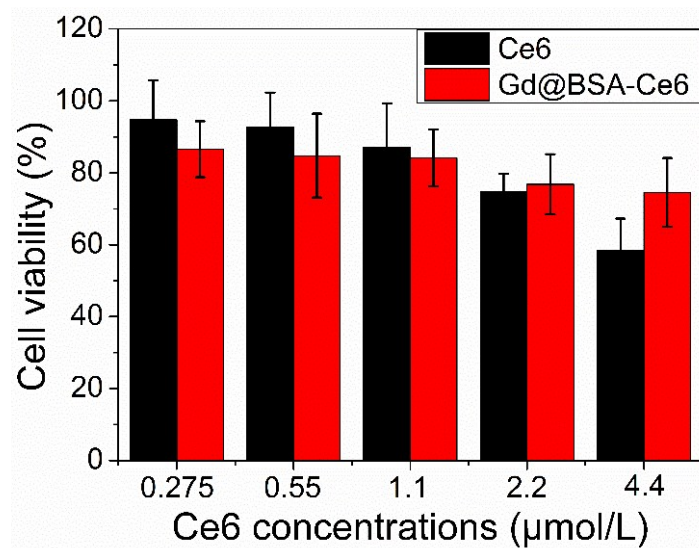

**Figure S2.** Cytotoxicity of Gd@BSA-Ce6 against 293T cells without irradiation.

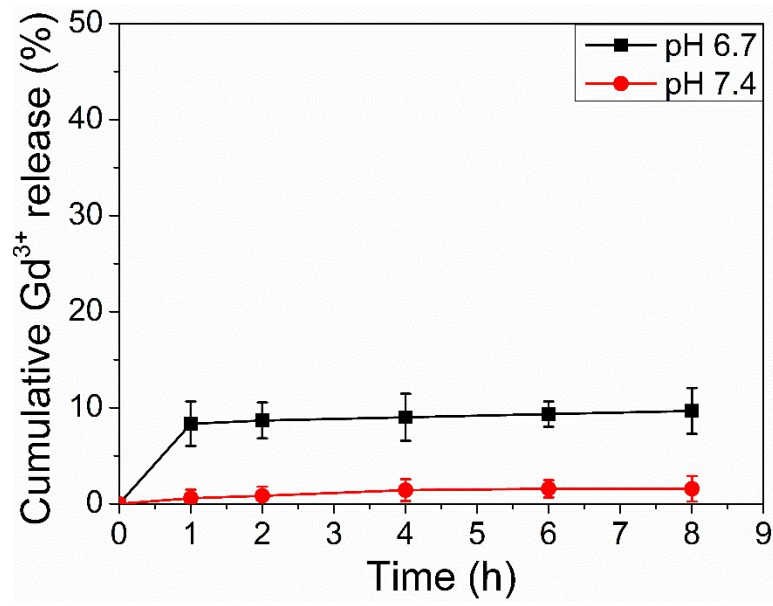

**Figure S3.** Cumulative Gd<sup>3+</sup> release behavior of Gd@BSA-Ce6 nanoparticles in DMEM containing 10 % FBS at pH 7.4 and pH 6.7 at 37 °C to mimic the conditions of the bloodstream and tumor tissues, respectively.
